# Supplementary material for: Translation factor and RNA binding protein mRNA interactomes support broader RNA regulons for posttranscriptional control
Source: PubMed Central journal article supplement (PMC10562868; doi:10.1016/j.jbc.2023.105195), 2023-08-24

**A**

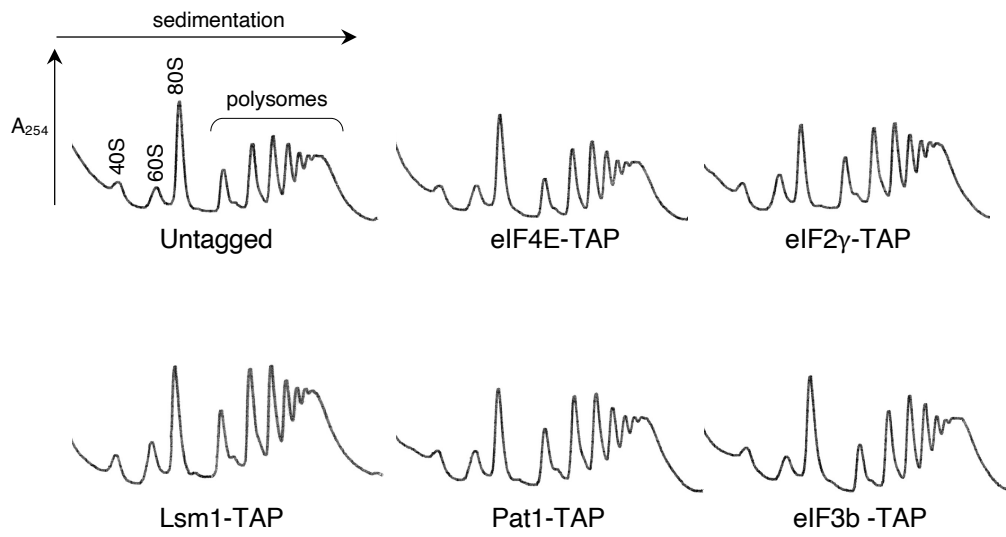

**B**

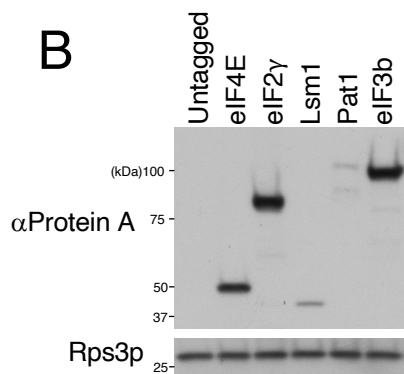

**C**

| gene         | protein       | process         | prot/cell<br>Kulak et al., 2014 |
|--------------|---------------|-----------------|---------------------------------|
| <i>CDC33</i> | eIF4E         | mRNA selection  | 35615                           |
| <i>GCD11</i> | eIF2 $\gamma$ | 43S interaction | 30911                           |
| <i>PRT1</i>  | eIF3b         | 43S interaction | 16001                           |
| <i>LSM1</i>  | Lsm1p         | mRNA decapping  | 1931                            |
| <i>PAT1</i>  | Pat1p         | mRNA decapping  | 2230                            |

A

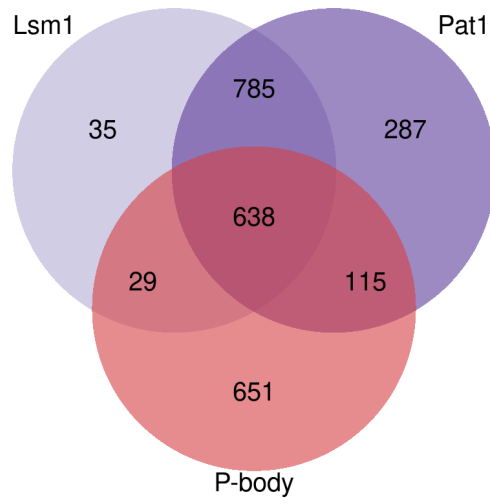

B

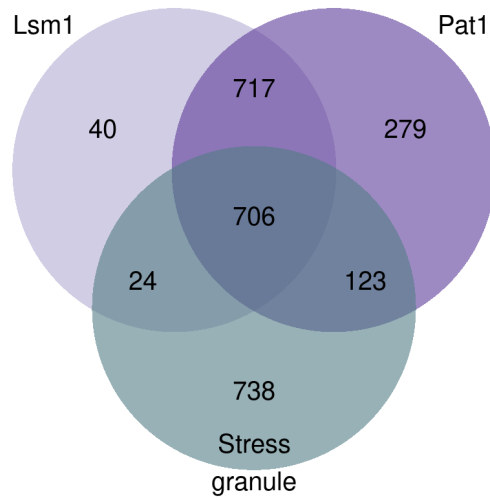

C

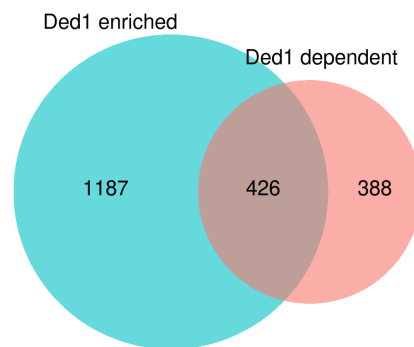

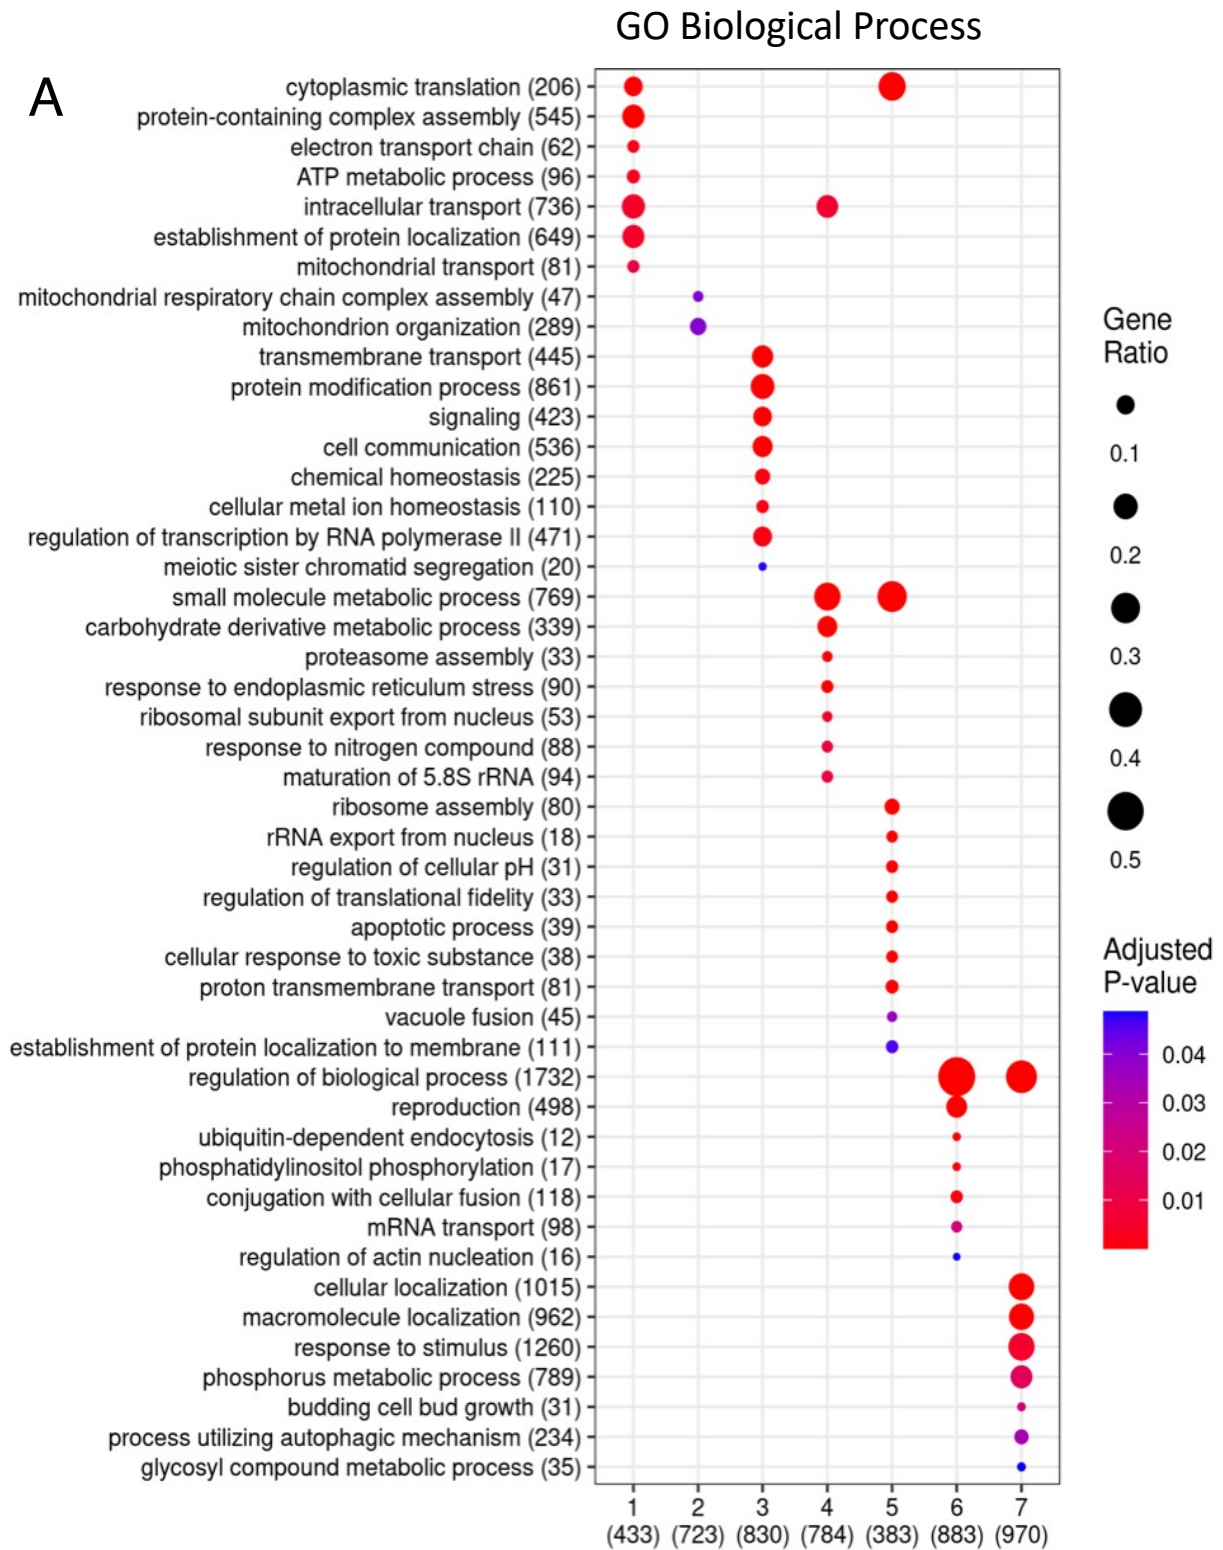

B

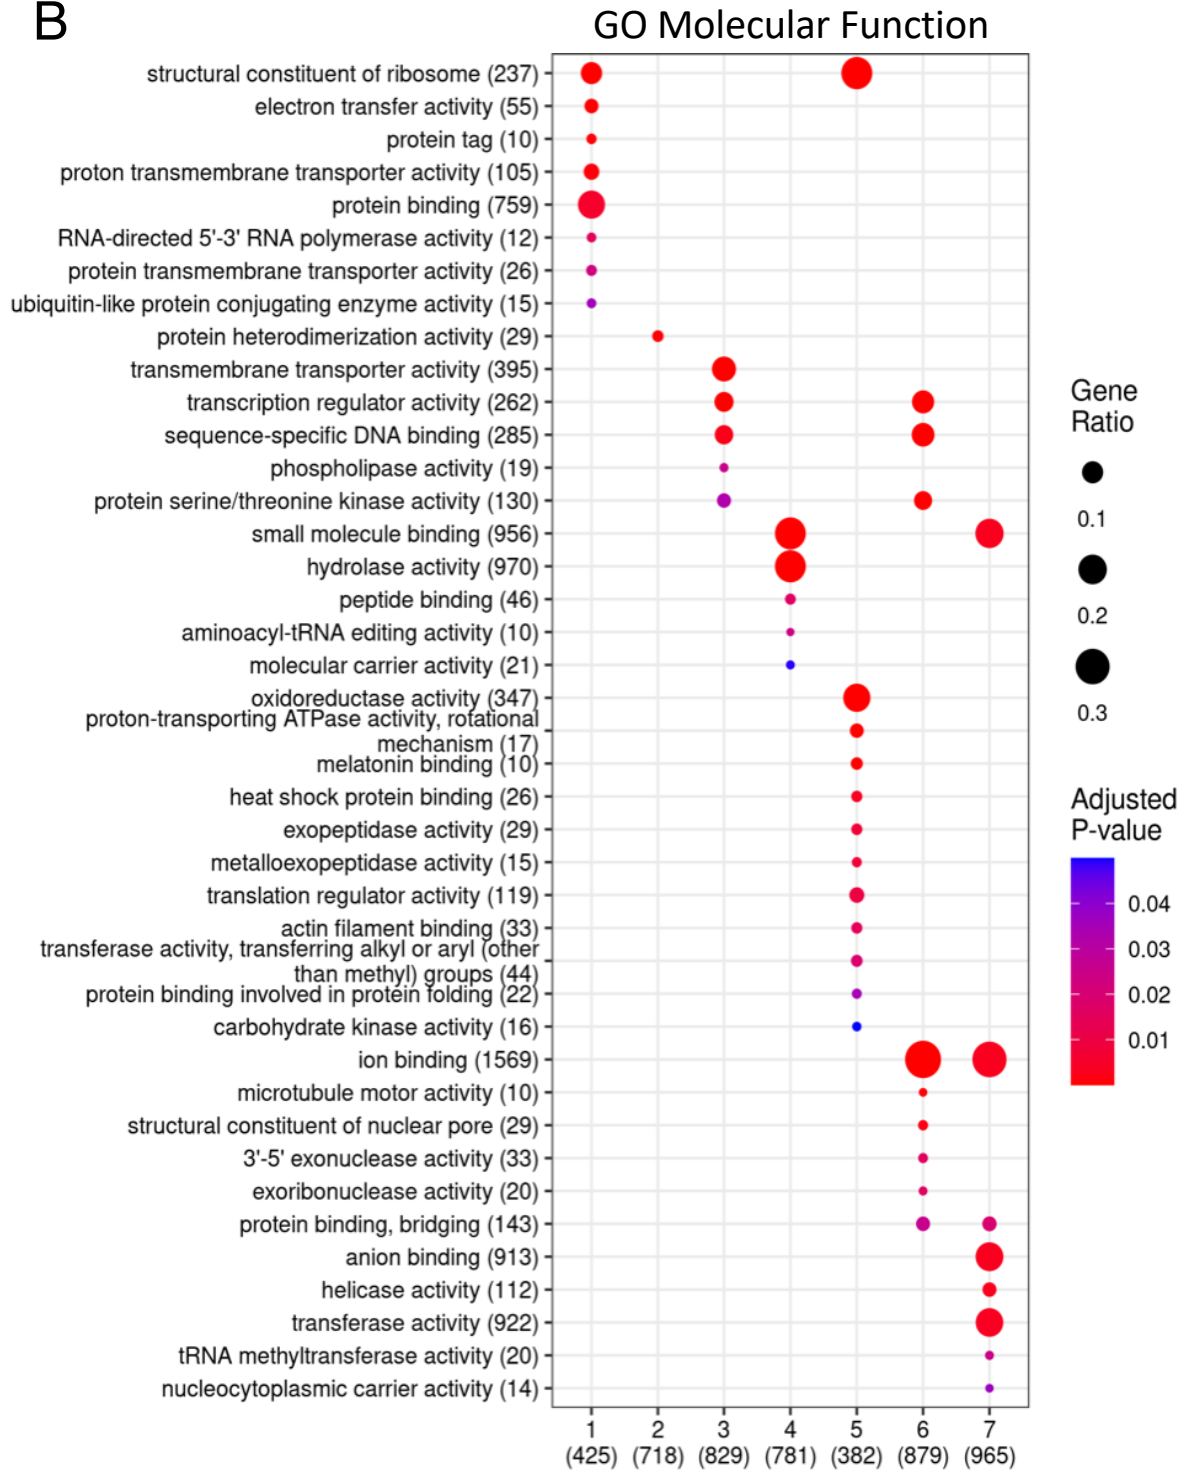

C

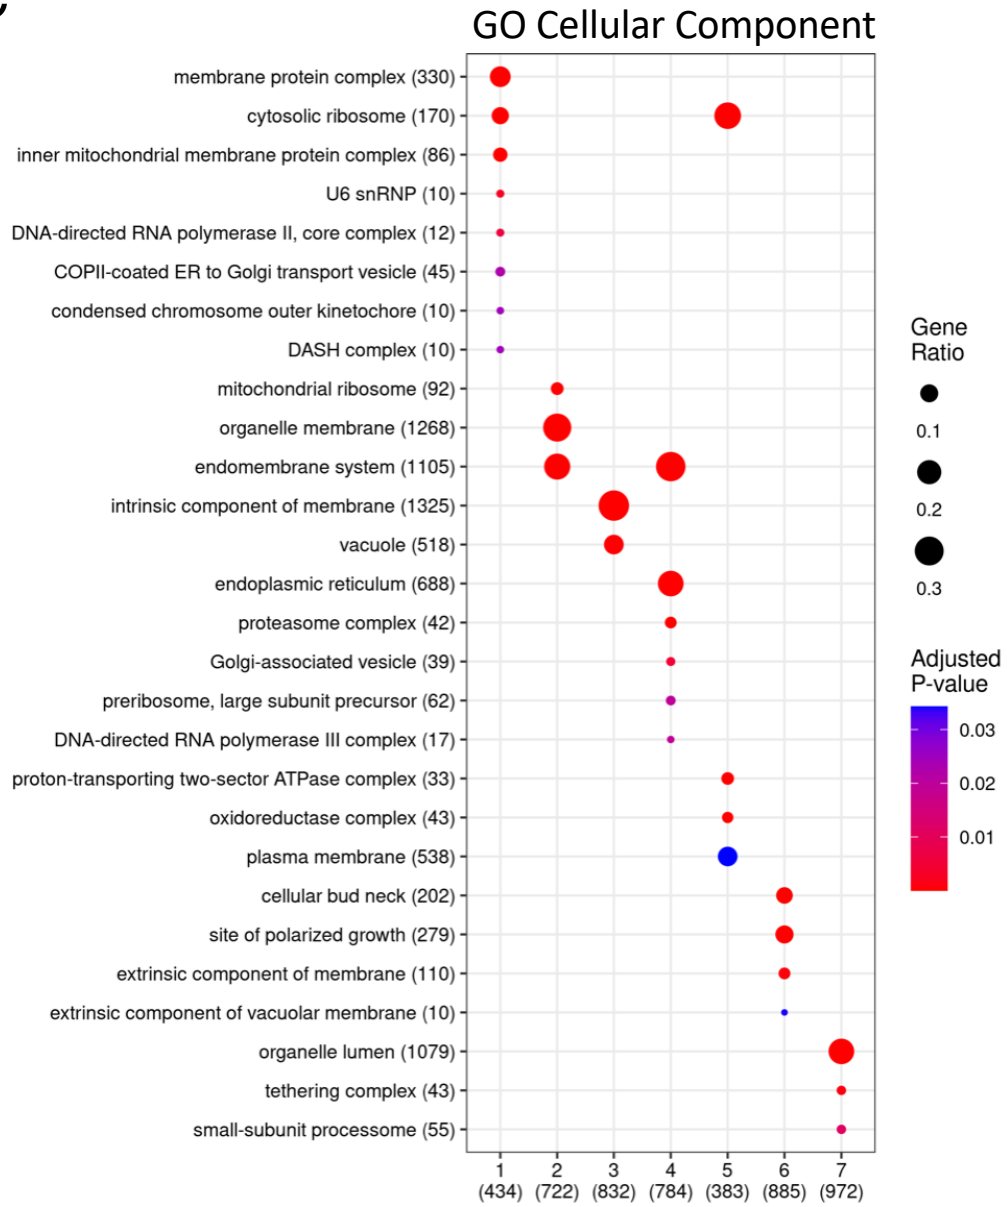

Supplement: mmc1.pdf [file mmc1.pdf]
